# Supplementary material
Source: Springer Nature journal article supplement (https://www.springermedizin.de/resource/supplementary/12990_2010_306_MOESM5_ESM.pdf/9612994)

**A** (MS/CI)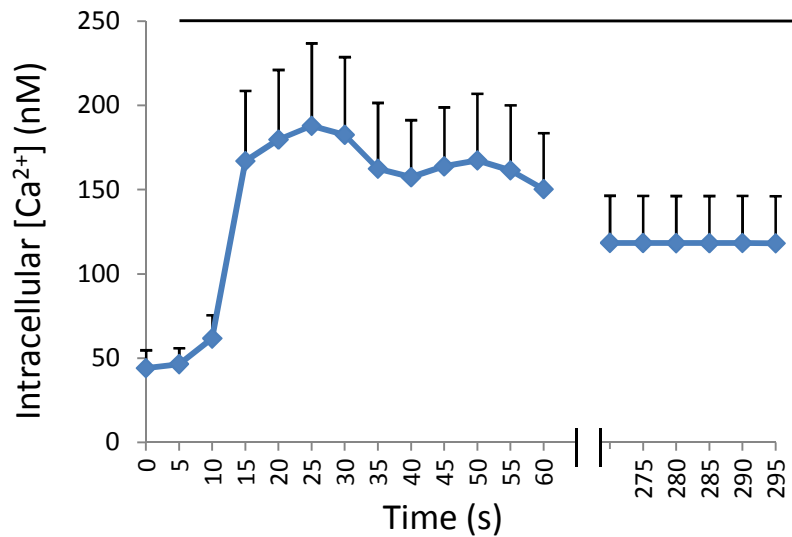**B** (MS/CI)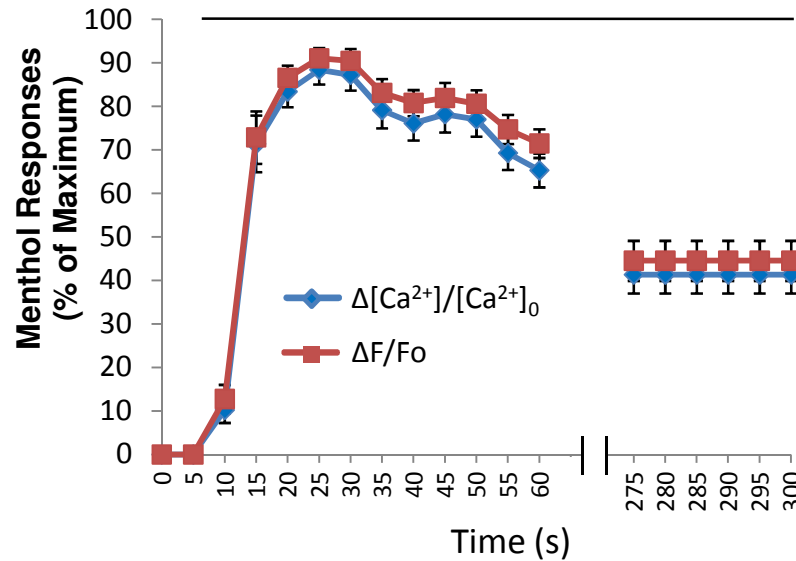**C**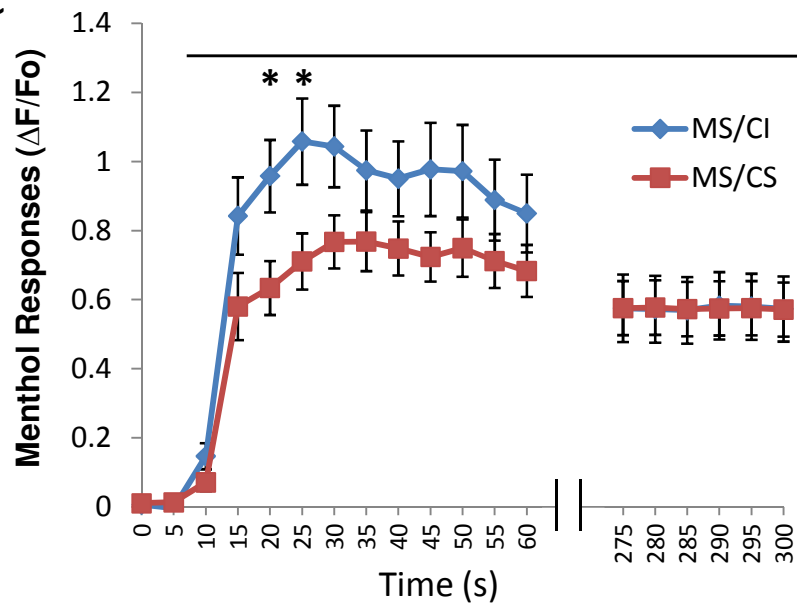**D**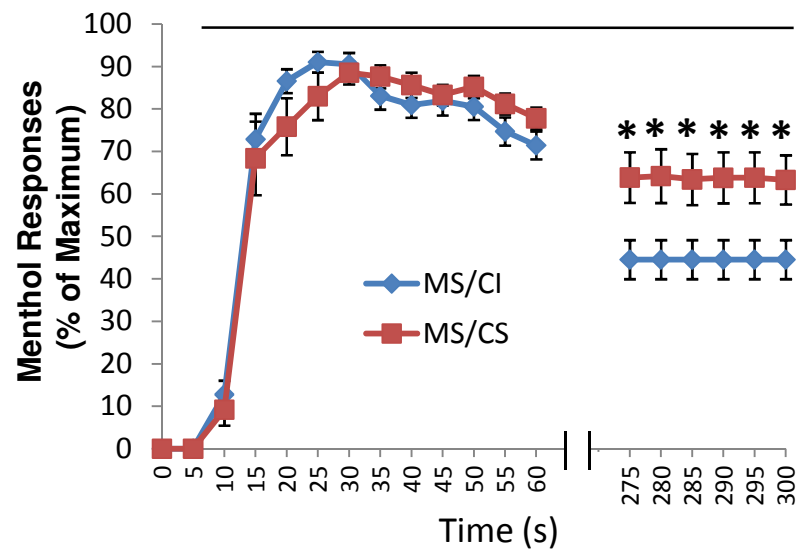

Supplement: MOESM5 [file 9612994]
